# Supplementary material for: Ultralow-cost personal PCRstrip with volumetric heating based on broadband absorption plasmonic fabric for POCT of pathogens
Source: Research Square preprint supplement (doi:10.21203/rs.3.rs-6336864/v1), 2025-05-05
Supplement: Supplementary file 1 [file 5dac6c61232f21f78728b101.docx]

**Supporting information (SI)**

**Ultralow-cost personal PCRstrip with volumetric heating based on broadband absorption plasmonic fabric for POCT of pathogens**

Yu Lua, Chang Liua, Qifan Zhoua, Yan Huanga, Jingwei Yib, Wei Jinb, Zhonghua Liub, Bangshun Hec,*, Xiangwei Zhaoa,*

a, State Key Laboratory of Digital Medical Engineering, School of Biological Science and Medical Engineering, Southeast University, Nanjing 211189, China. E-mail: xwzhao@seu.edu.cn

b, Jiangsu Bioperfectus Technologies Co., Ltd., Shanghai 201114, China

c, Department of Laboratory Medicine, Nanjing First Hospital, Nanjing Medical University, Nanjing 210006, China. E-mail: bhe@njmu.edu.cn


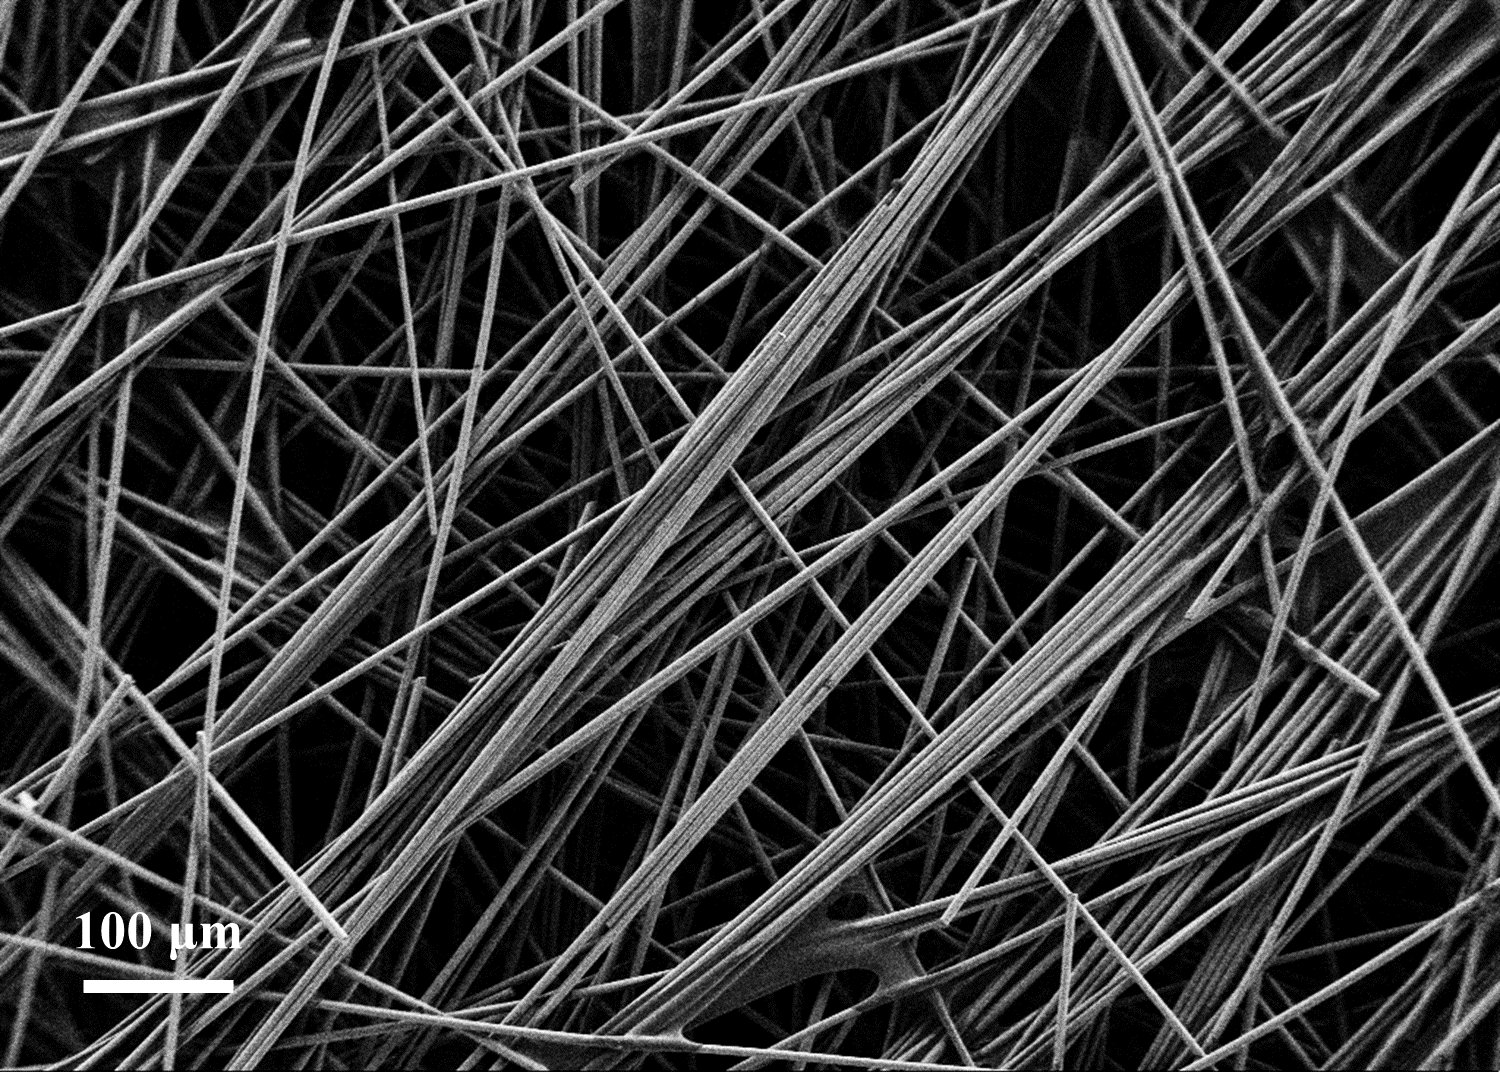


Figure S1 SEM image of GF


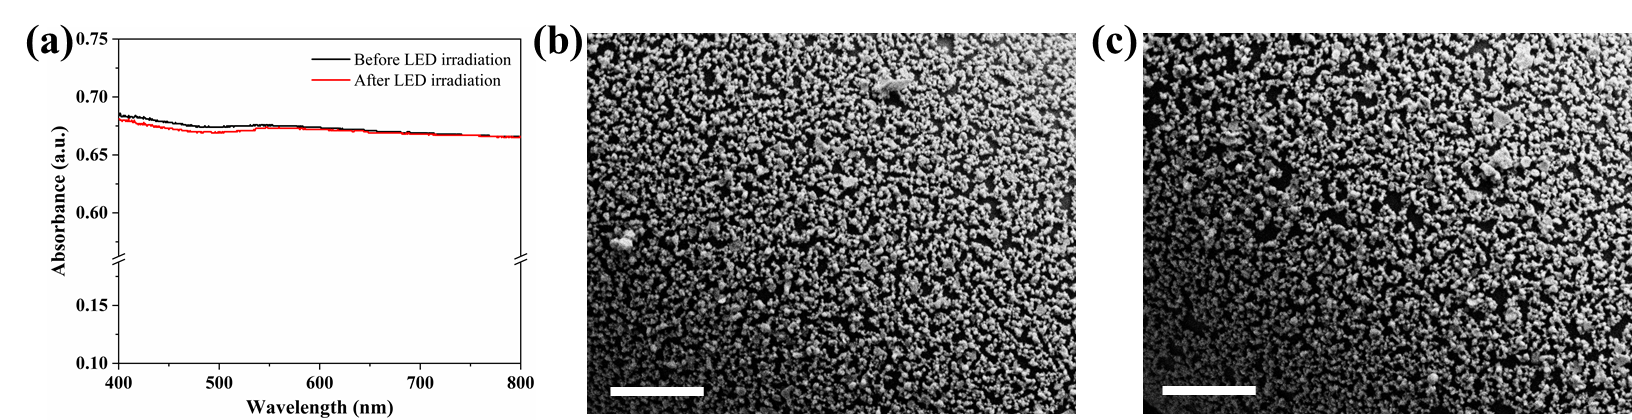


Figure S2 Thermal stability of silica coated BAPF. (a) Absorbance of silica coated BAPF before and after white LED irradiation. SEM image of silica coated BAPF before (b) and after (c) white LED irradiation. Scale bars are 1 μm.


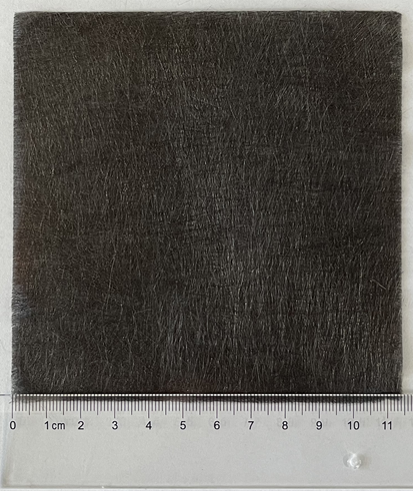


Figure S3 Digital image of BAPF with dimension of 11 cm×11 cm





Figure S4 Temperature profile of six batches of BAPF under white LED


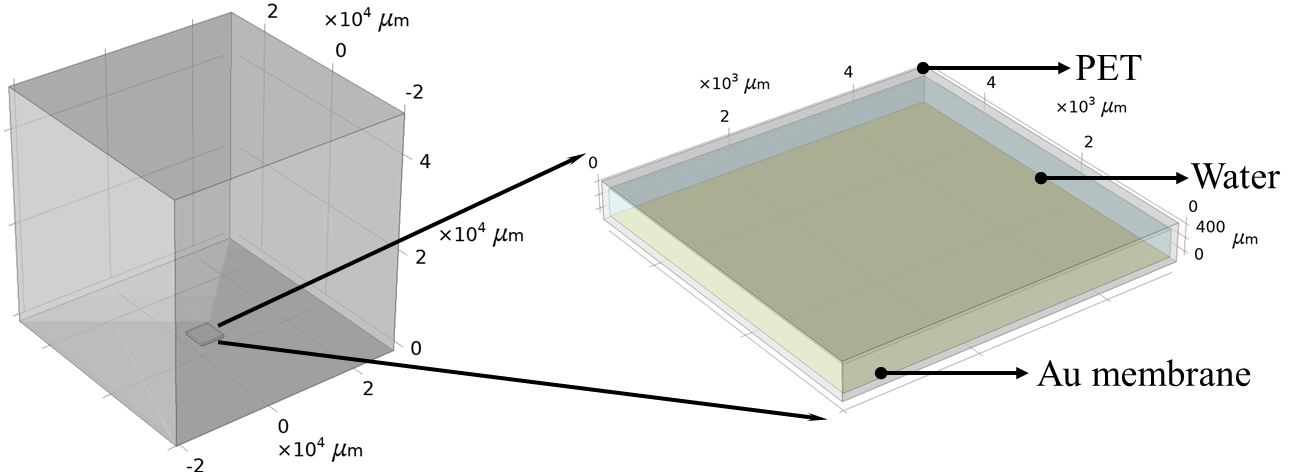


Figure S5 Detailed model structure of solution on Au membrane


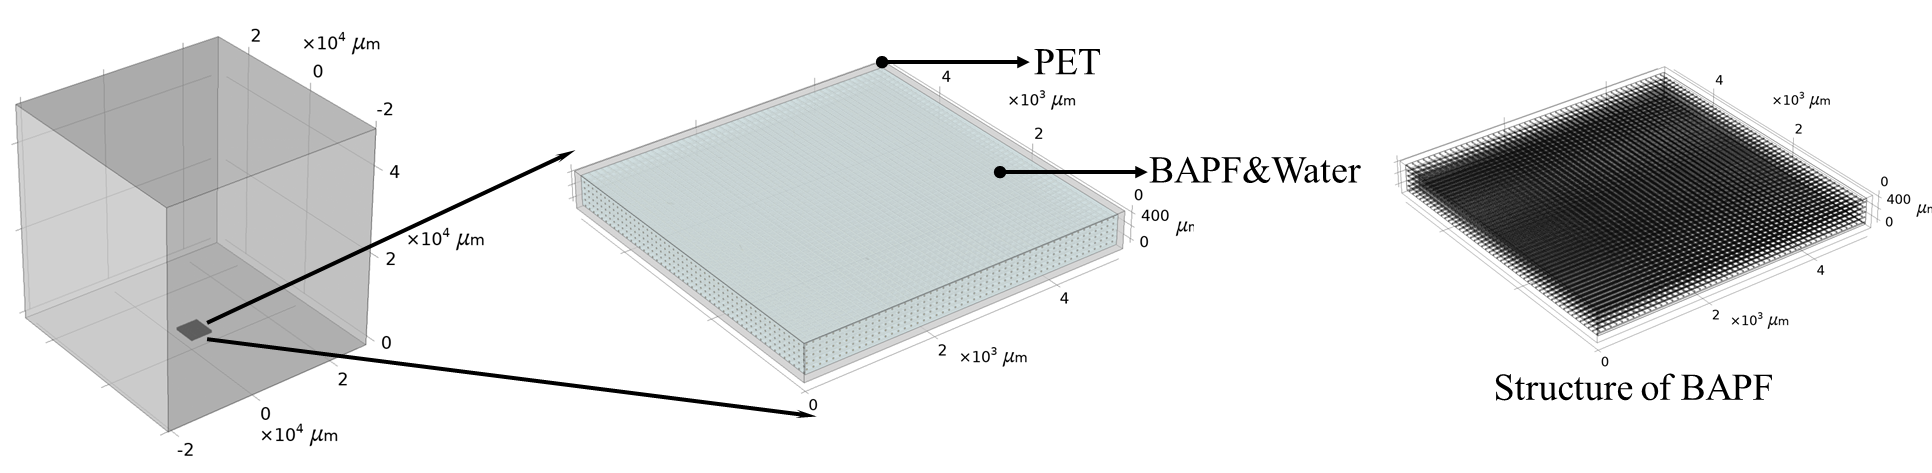


Figure S6 Detailed model structure of solution in BAPF


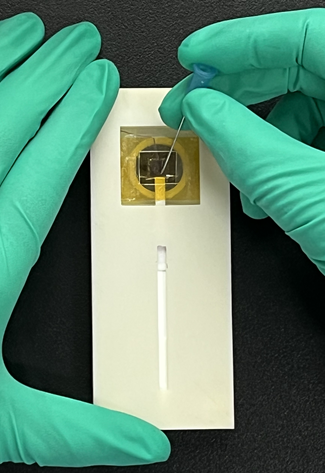


Figure S7 Digital image of the PET tape pricked by a needle after RT-PCR to release amplification products.


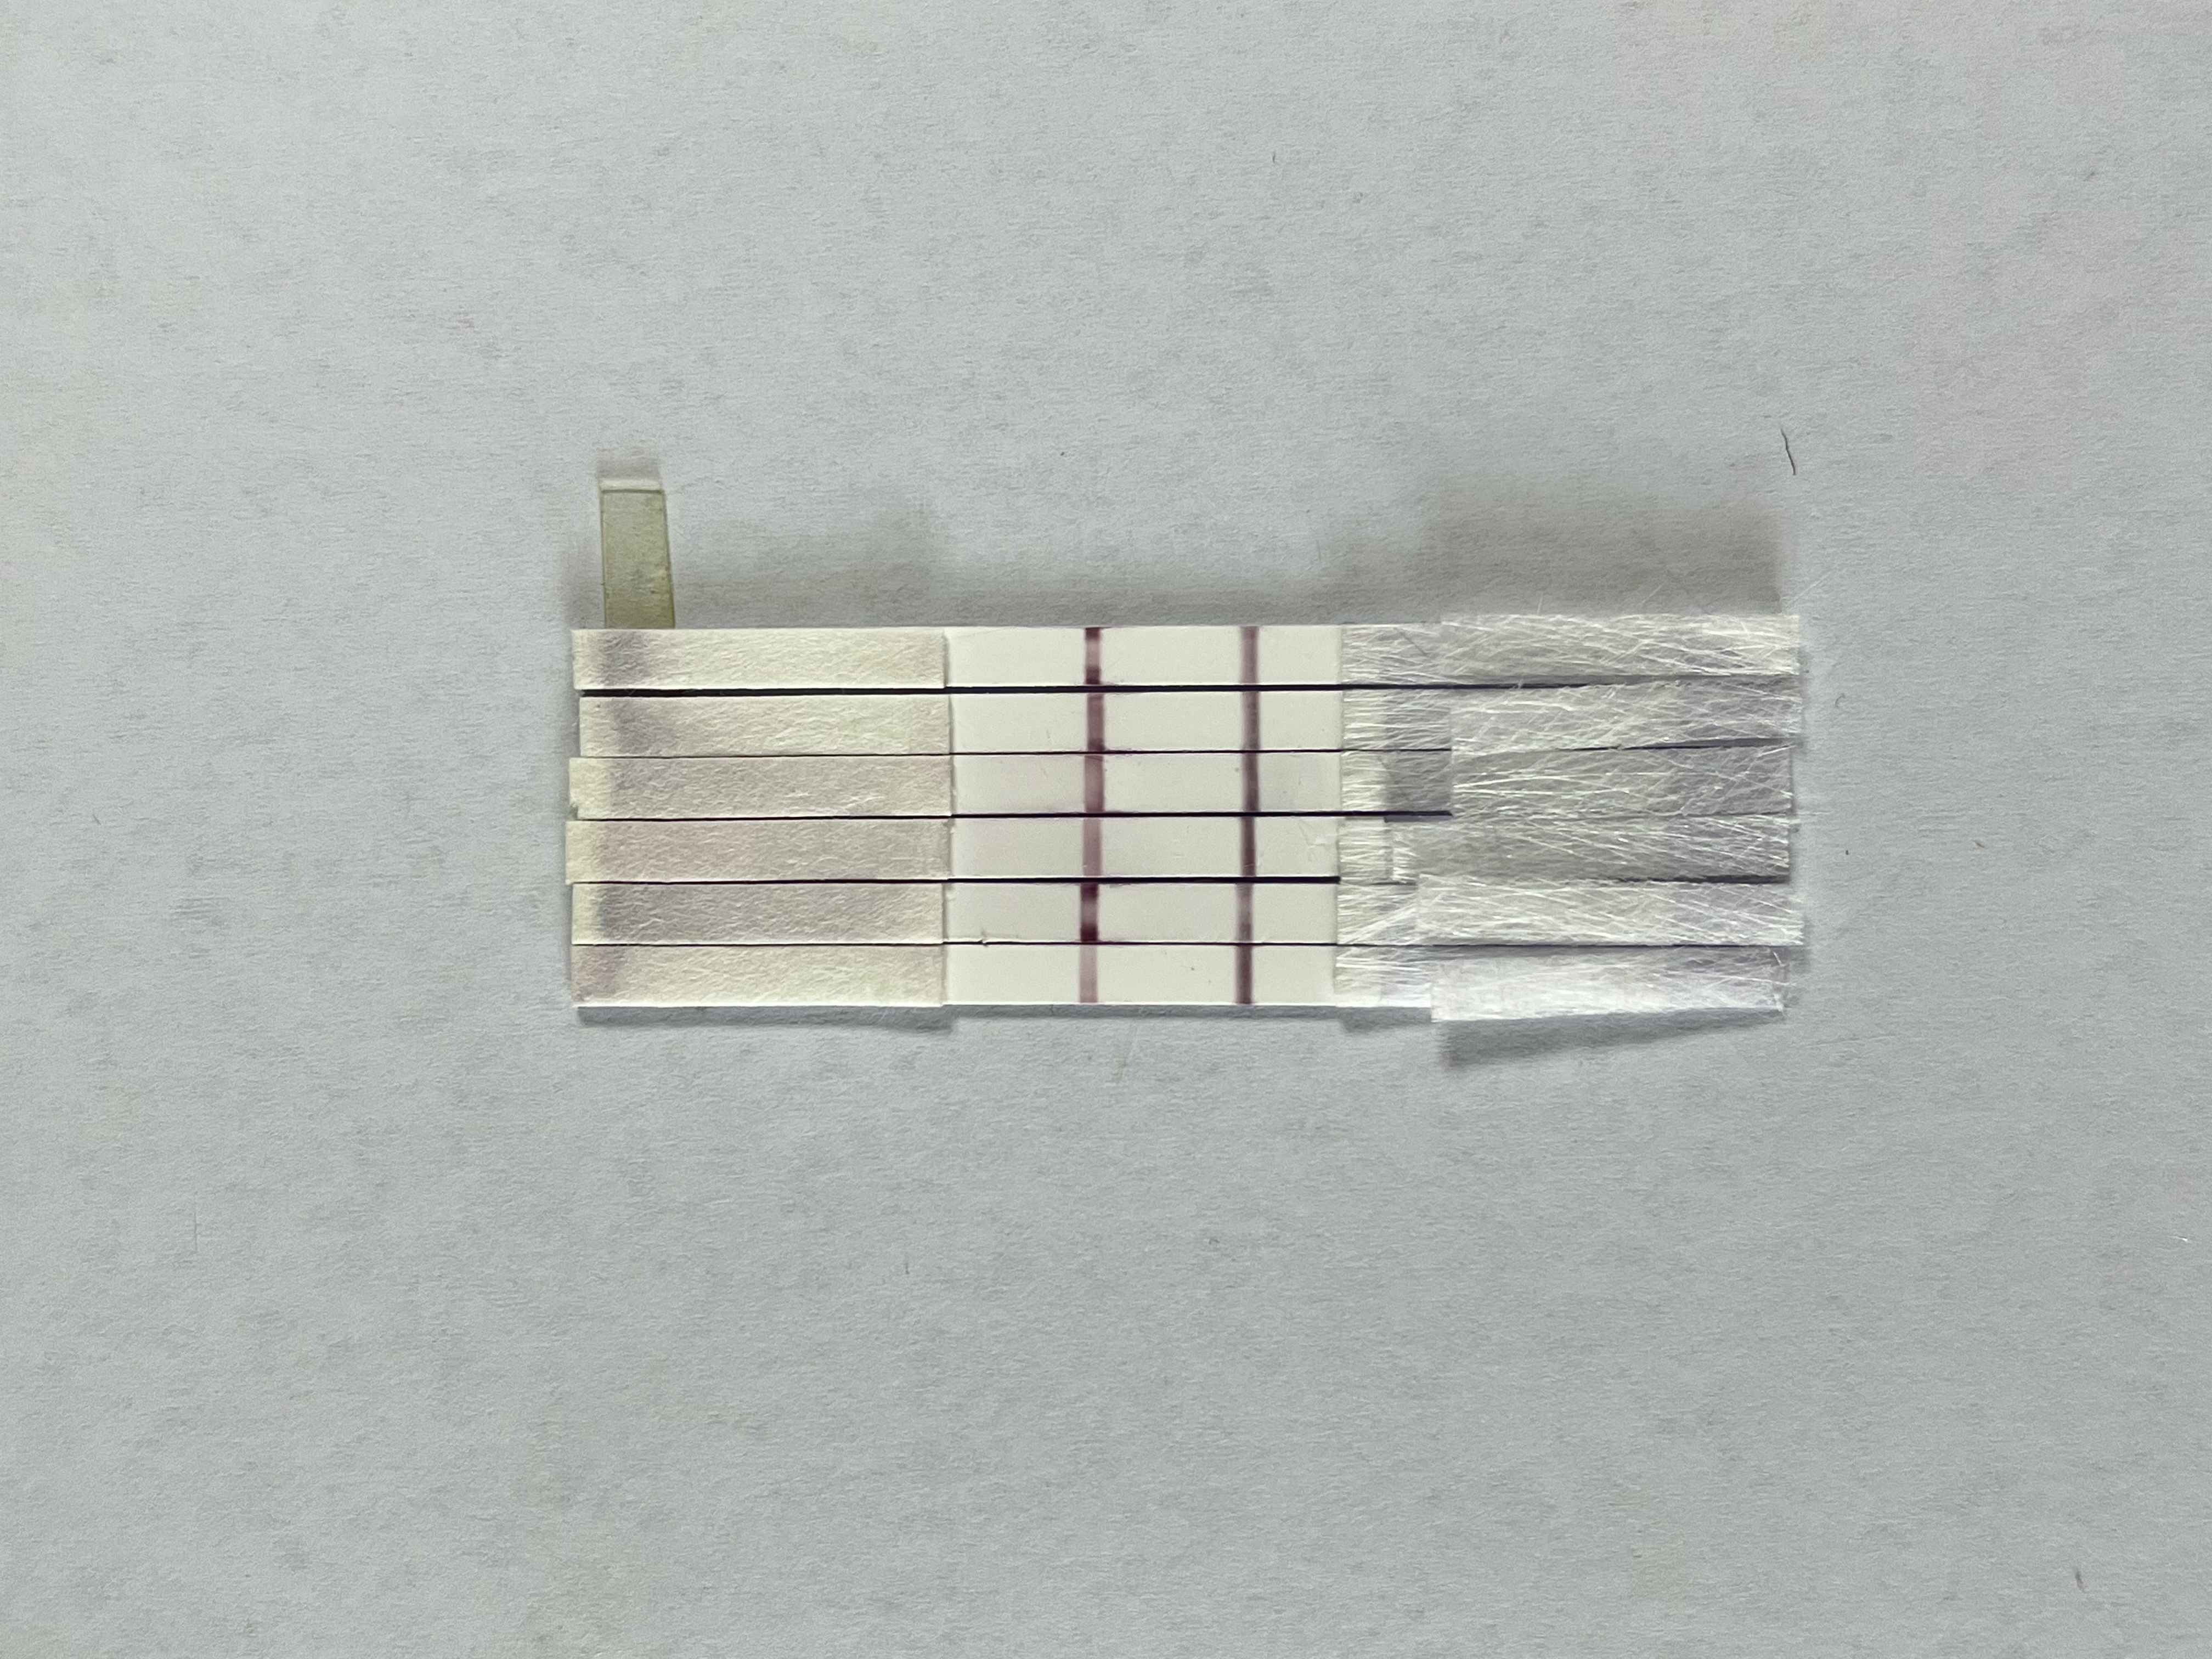


Figure S8 Test strips for six repetitions of influenza A photothermal RT-PCR products.


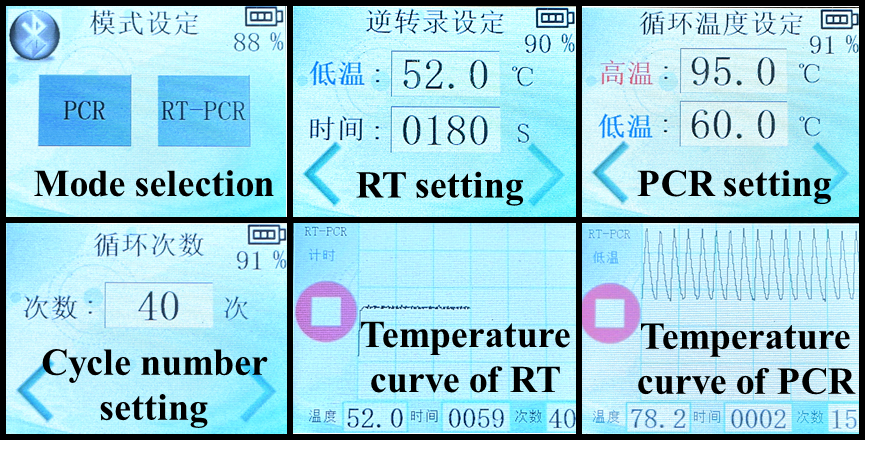


Figure S9 The graphical interface of POCT device


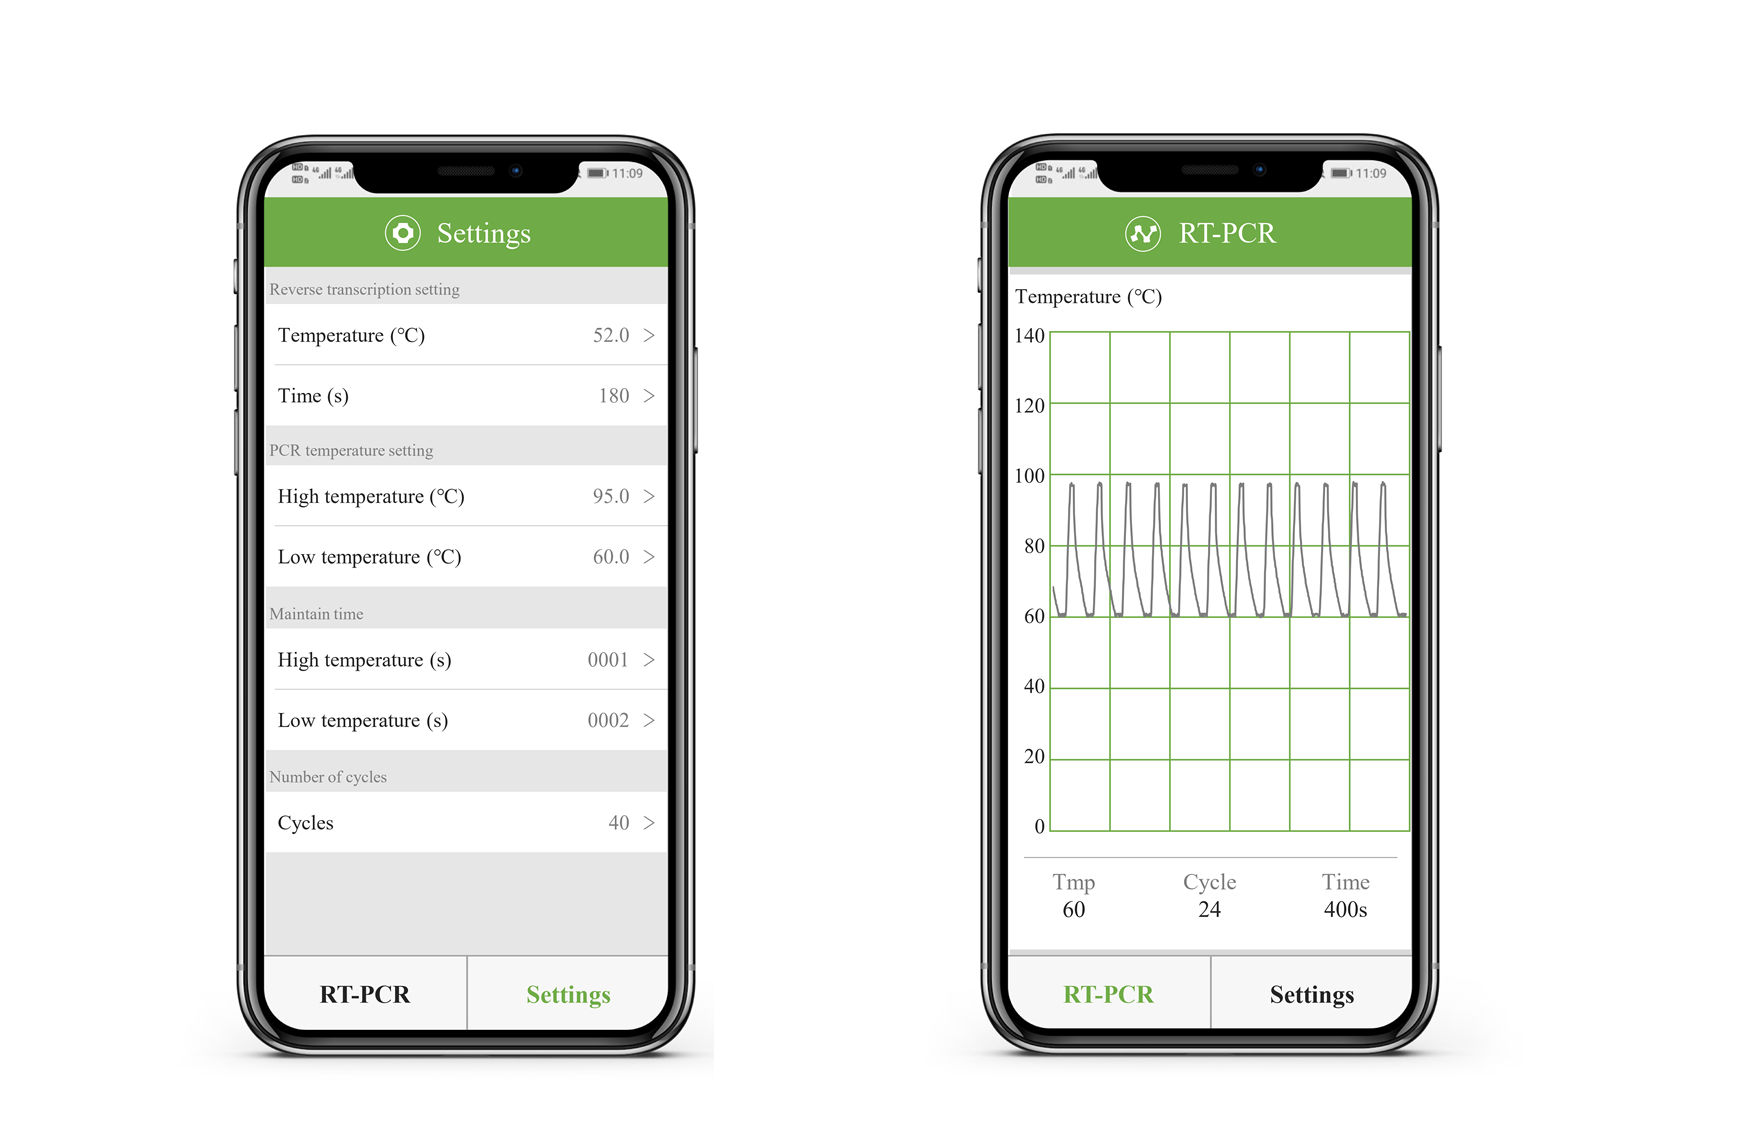


Figure S10 Application for the control of plasmonic thermocycler.


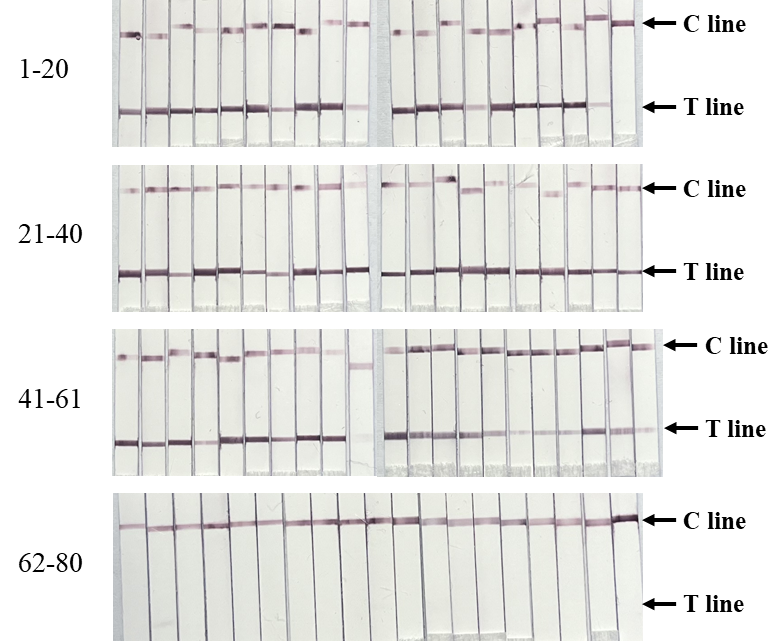


Figure S11 Images of lateral flow paper strips of 80 clinical samples

Table S1 Structure parameters in COMSOL Multiphysics

| Component | Width | Depth | Height | Thickness | Diameter | Length | Additional explanation |
| --- | --- | --- | --- | --- | --- | --- | --- |
| Au membrane | 5 mm | 5 mm | 120 nm |  |  |  |  |
| PCR solution in Au membrane model | 5 mm | 5 mm | 400 μm |  |  |  | The volume of PCR was set to 10 μL. |
| PET |  |  |  | 60 μm |  |  |  |
| Glass Fiber |  |  |  |  | 20 μm | 5000μm |  |
| PCR solution in BAPF model |  |  | 450μm |  |  |  | The volume of PCR was set to 10 μL and the volume of glass fibers were considered. |
| Air | 50 mm | 50 mm | 50 mm |  |  |  |  |
|  |  |  |  |  |  |  |  |

Table S2 Sequence of primer and modified primer for lambda DNA and influenza A H1N1

| Specific gene | Type | Primer and probe sequence (5’-3’) | 5’ tag |
| --- | --- | --- | --- |
| Lambda DNA | Forward primer | CATCGTCTGCCTGTCATGGGCTGTTAAT | - |
| Reverse primer | TCGCCAGCTTCAGTTCTCTGCGATTT | - |
| Influenza A H1N1: matrix protein 1 | Forward primer | TAAAGACAAGACCAATCCTGTCACC | Biotin |
| Reverse primer | TCCCATTTAGGGCATTTTGGACAAAGC | 6-FAM |

Table S3 Target gene sequence of lambda DNA and influenza A

| Specific gene | Target sequence |
| --- | --- |
| Lambda DNA (98 bp/48502 bp) | CATCGTCTGCCTGTCATGGGCTGTTAATCATTACCGTGATAACGCCATTACCTACAAAGCCCAGCGCGACAAAAATGCCAGAGAACTGAAGCTGGCGA |
| Influenza A H1N1: matrix protein 1 (123 bp/759 bp) | TAAAGACAAGACCAATCCTGTCACCTCTGACTAAGGGGATTTTAGGATTTGTGTTCACGCTCACCGTGCCCAGTGAGCGAGGACTGCAGCGTAGACGCTTTGTCCAAAATGCCCTTAATGGGA |

Table S4 Ct value information of all clinical samples

Influenza A positive samples

| No. | Ct | No. | Ct | No. | Ct | No. | Ct |
| --- | --- | --- | --- | --- | --- | --- | --- |
| 1 | 24.01 | 17 | 25.45 | 33 | 24.18 | 49 | 23.31 |
| 2 | 21.90 | 18 | 20.40 | 34 | 21.12 | 50 | 34.15 |
| 3 | 22.85 | 19 | 31.74 | 35 | 20.60 | 51 | 21.35 |
| 4 | 22.13 | 20 | 29.96 | 36 | 22.50 | 52 | 26.16 |
| 5 | 23.37 | 21 | 21.53 | 37 | 18.96 | 53 | 25.69 |
| 6 | 18.18 | 22 | 21.20 | 38 | 21.34 | 54 | 25.49 |
| 7 | 28.09 | 23 | 25.28 | 39 | 25.47 | 55 | 28.38 |
| 8 | 21.45 | 24 | 19.80 | 40 | 26.23 | 56 | 33.18 |
| 9 | 20.15 | 25 | 21.53 | 41 | 21.05 | 57 | 30.36 |
| 10 | 31.58 | 26 | 24.70 | 42 | 24.15 | 58 | 30.72 |
| 11 | 19.95 | 27 | 26.15 | 43 | 22.07 | 59 | 24.16 |
| 12 | 20.04 | 28 | 19.23 | 44 | 28.49 | 60 | 26.29 |
| 13 | 21.64 | 29 | 25.53 | 45 | 20.76 | 61 | 34.13 |
| 14 | 27.50 | 30 | 22.80 | 46 | 21.88 |  |  |
| 15 | 20.34 | 31 | 24.77 | 47 | 26.81 |  |  |
| 16 | 22.18 | 32 | 23.40 | 48 | 24.17 |  |  |

Influenza A negative samples

| No. | Ct | No. | Ct | No. | Ct | No. | Ct |
| --- | --- | --- | --- | --- | --- | --- | --- |
| 62 | 35.81 | 67 | 36.29 | 72 | 37.12 | 77 | 37.79 |
| 63 | 35.83 | 68 | 35.83 | 73 | 35.97 | 78 | 36.61 |
| 64 | 35.87 | 69 | 36.02 | 74 | 35.96 | 79 | 36.13 |
| 65 | 36.11 | 70 | 36.57 | 75 | 36.53 | 80 | 36.30 |
| 66 | 35.65 | 71 | 35.18 | 76 | 35.48 |  |  |

Table S5 Main components for construction of the photothermal PCR system

| Components | Model/material | | Price (USD) | Quantity |
| --- | --- | --- | --- | --- |
| Control board | STM32F407 | | 4.13 | 1 |
| Type-K thermocouple | KPS-QB-K | | 1.10 | 1 |
| Thermocouple module | MAX31855 | | 4.31 | 1 |
| White LED with focus lens | Luxeon M | | 3.19 | 1 |
| Cooper radiator with fan | XINYI | | 1.84 | 1 |
| LED driver | ZS-1208 | | 1.52 | 1 |
| Cooling fan with motor module | L9110 | | 1.65 | 1 |
| Lithium-ion batteries with charger | 12V, 3000 mAh | | 7.35 | 1 |
| TFT LCD touch panel | TJC3224T124 | | 4.13 | 1 |
| Bluetooth module | HC-05 | | 1.54 | 1 |
| 3D printed parts (body+chip) | Homemade | | 20.67 | 1 |
| Lateral flow paper strip | Homemade | | 0.69 | 1 |
| Total price | | 52.12 (USD) | | |
